# Supplementary material
Source: PubMed Central journal article supplement (PMC3320134)
Supplement: 11_210_Nogueira-Silva.Suppl.pdf [file 11_210_Nogueira-Silva.Suppl.pdf]

Supplemental Data

# Local Fetal Lung Renin-Angiotensin System as a Target to Treat Congenital Diaphragmatic Hernia

Cristina Nogueira-Silva,<sup>1,2,3</sup> Emanuel Carvalho-Dias,<sup>1,2,4</sup> Paulina Piairol,<sup>1,2</sup> Susana Nunes,<sup>5</sup> Maria J Baptista,<sup>1,2,6</sup> Rute S Moura,<sup>1,2</sup> and Jorge Correia-Pinto<sup>1,2,7</sup>

Online address: <http://www.molmed.org>

The Feinstein Institute  
for Medical Research 

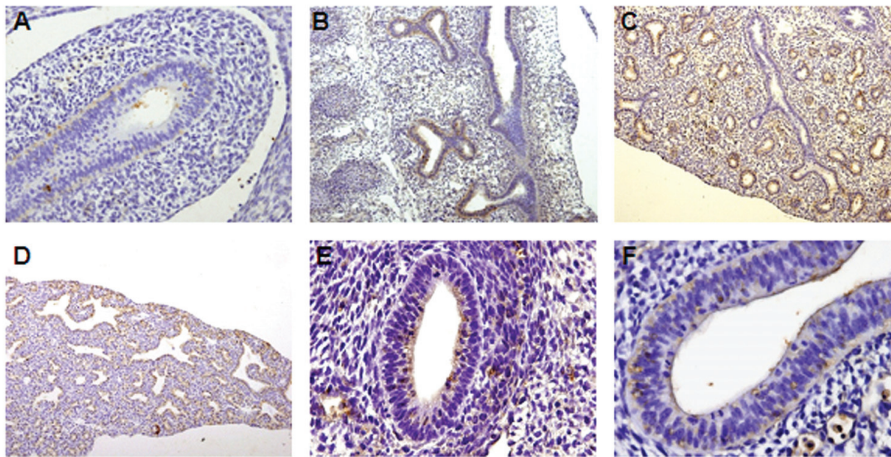

**Supplemental Figure 1.** Protein expression pattern of renin-angiotensin system components during early stages of fetal lung development. (A-D) Renin expression at 13.5, 15.5, 17.5 and 19.5 d post-conception (dpc), respectively. Renin protein expression appears to be maximal in the branching buds. (E) ACE and (F) AT<sub>2</sub> receptor expression in epithelial cells at 13.5 dpc. Original magnification: x100 (B-D), x200 (A), x400 (E, F).

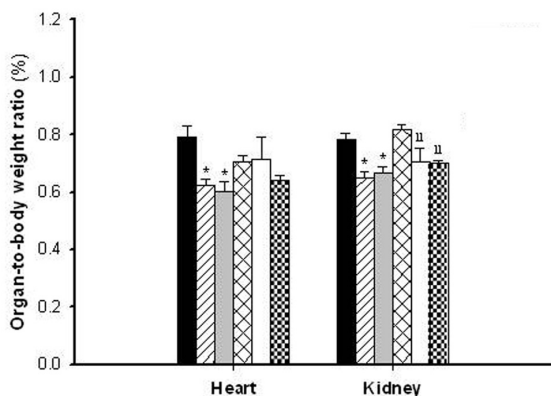

**Supplemental Figure 2.** Antenatal PD-123319 treatment effects on fetal heart and kidney. Heart-to-body weight and kidney-to-body weight ratios in control (C), nitrofen (N) and CDH groups treated with saline (■, C+S; ▨, N+S; ▩, CDH+S) or PD-123319 (▧, C+PD; □, N+PD; ▦, CDH+PD). The nitrofen treatment (nitrofen and CDH groups) induced decrease of heart and kidney-to-body weight ratios. Antenatal PD-123319 administration did not significantly change either heart or kidney growth. Results are expressed as %.  $p < 0.05$ : \* vs. C+S, \*\* vs. C+PD.

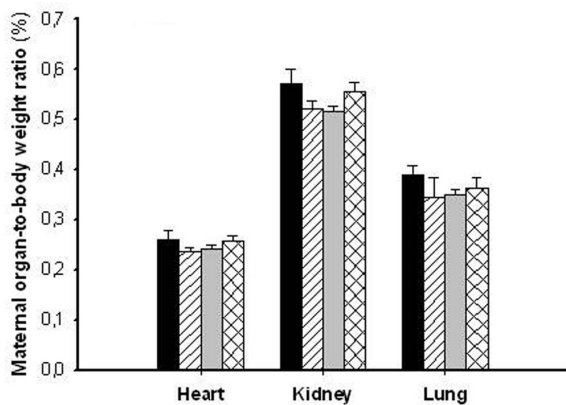

**Supplemental Figure 3.** Heart, kidney and lung-to-body weight ratios in control and exposed to nitrofen pregnant rats, treated with (■, C+S; ▨, N+S) or PD-123319 (▩, C+PD; ▧, N+PD). PD-123319 treatment did not significantly change heart, kidney or lung-to-body weight ratios. Results are expressed as %.

**Supplemental Table 1.** Morphometric assessment of pulmonary arteries stained with Weigert's resorcin fuchsin solution.

|        | Arteries examined per animal (n) | ED (μm)     | ID (μm)     | MA (%)      | AA (%)      |
|--------|----------------------------------|-------------|-------------|-------------|-------------|
| C+S    | 71.33±11.62                      | 49.86±1.65  | 44.43±1.63  | 23.71±0.62  | 16.04±0.41  |
| CDH+S  | 62.2±12.99                       | 35.01±1.51* | 27.75±1.49* | 43.67±1.27* | 30.27±0.87* |
| CDH+PD | 70.33±9.60                       | 34.69±1.34* | 29.96±1.33† | 30.07±0.84† | 29.14±0.79* |

AA: adventitial area; C: control; CDH: congenital diaphragmatic hernia; ED: external diameter; ID: internal diameter; MA: medial area; PD: PD-123319; S: saline. Values represent the mean ± SEM of measurements.  $p < 0.001$ : \*vs. C+S; †vs. CDH+S.
